# Supplementary material
Source: HighWire-hosted journal article supplement (http://www.cmaj.ca/highwire/filestream/58453/field_highwire_adjunct_files/0/pg1223.pdf)
Supplement: pg1223.pdf [file pg1223.pdf]

# CMAJ·JAMC

## PRODUCTION

Production Manager • Gestionnaire de la production  
Kathryn A. Freamo

Production Assistants • Assistantes à la production  
Nicole Barbeau, Lianne Johnsen, Carole Lalonde

## ADVERTISING • PUBLICITÉ

Manager, Journal Advertising  
Gestionnaire, Annonces publicitaires  
Beverley Kirkpatrick

Coordinator, Display Advertising  
Coordonnatrice de la publicité  
Nancy Pope

Assistant Manager, Classified Advertising  
Gestionnaire adjointe, annonces classées  
Deborah Rodd

613 731-9331, fax 613 565-7488  
advertising@cma.ca

For information on how to advertise  
in any of the CMA journals  
[www.cma.ca](http://www.cma.ca)

Pour savoir comment placer une annonce  
dans les revues publiées par l'AMC  
[www.cma.ca](http://www.cma.ca)

Marketing and Advertising Sales  
Marketing et publicité  
Keith Health Care Inc.

| Toronto          | Montréal         |
|------------------|------------------|
| 905 278-6700     | 514 624-6979     |
| 800 661-5004     | 877 761-0447     |
| fax 905 278-4850 | fax 514 624-6707 |

All prescription drug advertisements have been cleared by the Pharmaceutical Advertising Advisory Board.

Toutes les annonces de médicaments prescrits ont été approuvées par le Conseil consultatif de publicité pharmaceutique.

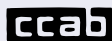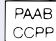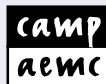

ASSOCIATION  
MÉDICALE  
CANADIENNE

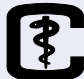

CANADIAN  
MEDICAL  
ASSOCIATION

President • Président  
Hugh Scully, MD CM, MSc

Secretary General • Secrétaire général  
Peter W. Vaughan, MD, MPH

Director, Publications  
Directeur, Publications  
R. Peter Milroy

Manager, Publishing Services  
Gestionnaire, Services de publication  
Jill Rafuse

Publications Committee • Comité des publications  
Stuart M. MacLeod, MD (Chairman • Président)

Henry Haddad, MD  
Philip F. Hall, MD  
Barbara P. Lent, MD  
D'Arcy Lawrence Little, MD  
Jonathan L. Meakins, MD  
Mark Roper, MD  
W. Grant Thompson, MD

Permissions • Permissions  
Karen McKenzie (mckenk@cma.ca)

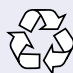

Printed on recycled paper • Imprimé sur papier recyclé

## Mot du rédacteur en chef

English on previous page

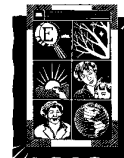

### Médecins Sans Frontières : des témoins

Le 15 octobre, l'organisation internationale de secours médical Médecins Sans Frontières (MSF) a reçu le Prix Nobel de la paix. Nous lui transmettons nos félicitations.

MSF a été fondée en 1971 par des médecins français participant à des missions de secours, frustrés par les lacunes de l'aide internationale, qui ne fournissait pas suffisamment d'aide médicale et qui se butait aux obstacles administratifs et diplomatiques<sup>1</sup>. À ses débuts, MSF a adopté la politique du Comité international de la Croix-Rouge en demeurant muette au sujet des événements dont elle était témoin au cours de ses missions. L'organisation voulait ainsi préserver une image de neutralité politique et s'assurer de la collaboration des gouvernements qui lui permettraient de poursuivre ses activités humanitaires. L'expérience des représentants de MSF en Éthiopie au milieu des années 80 a persuadé l'organisation de faire volte face. Maintenant, sans compter sa mission principale qui est de fournir de l'aide médicale d'urgence, MSF est aussi une présence internationale prête à dénoncer les abus dans le domaine des droits de la personne et le génocide et à protester contre de telles activités.

Il y a une cinquantaine de conflits en cours dans le monde d'aujourd'hui, et l'on estime que 2 millions de personnes, surtout des femmes et des enfants, en sont victimes chaque année. John Ralston Saul indique qu'au cours de la deuxième moitié du 20<sup>e</sup> siècle, notre civilisation est devenue de plus en plus inconsciente. Il affirme que l'individu se sent indifférent ou impuissant face à l'influence croissante des gouvernements et à la corporatisation grandissante<sup>2</sup>. MSF en est une contrepartie impressionnante. À cause du rôle qu'ils jouent dans les soins dispensés aux malades et aux blessés, les travailleurs de la santé sont souvent parmi les premiers à découvrir les violations des droits de la personne. Il en découle une responsabilité parfois dangereuse, soit

celle de se faire entendre. Ceux d'entre nous qui demeurent chez eux devraient-ils les appuyer?

Les associations médicales nationales ont en grande partie évité d'intervenir directement dans ces conflits : elles ne se sont pas fait entendre, mais elles devraient le faire. Elles pourraient aussi assumer une plus grande responsabilité en participant aux efforts de secours, en appuyant des initiatives de mise en commun de technologies et de renseignements médicaux, en collaborant de près avec les associations médicales des pays touchés et en exerçant des pressions politiques sur les gouvernements qui se livrent à des abus. Il est clair que les journaux médicaux peuvent jouer un rôle en commentant les affaires internationales. Les journaux médicaux ne sont pas le premier endroit où l'on pourrait chercher des reportages sur le Rwanda, par exemple, mais certains permettent à leur conscience sociale de les mener plus loin que d'autres. Le *JAMC* n'a publié qu'un seul compte rendu direct et une recension de livres sur le bain de sang au Rwanda (les deux étaient du même auteur, étudiant en médecine)<sup>3,4</sup>. Le *JAMA* a publié 6 articles, le *BMJ*, un, et les *Annals of Internal Medicine* et le *New England Journal of Medicine*, aucun. Seul *Lancet* a fait résolument œuvre de témoin en publiant, depuis 1995, 21 articles sur le Rwanda.

Même si nous pourrions nous consoler un peu en pensant que d'autres journaux médicaux ont passé sous silence ce qui se passe à l'extérieur de leur propre champ d'action, nos associations médicales et nous-mêmes devons jouer notre rôle. Il est temps de suivre l'exemple de MSF et d'autres organisations humanitaires et de nous faire entendre.

#### Références

1. [www.dwb.org/reports/msfexperience.htm](http://www.dwb.org/reports/msfexperience.htm)
2. Saul JR. *The unconscious civilization*. Toronto : Anansi; 1995. p. 11.
3. Andrews C. Words cannot describe: a trip into Rwanda's heart of darkness. *CMAJ* 1998;158(1):84-6.
4. Andrews C. Rwanda redux [compte rendu]. *CMAJ* 1999;160(4):537-8.
